# Supplementary material for: Demands for Community Services and Associated Factors among Residents in Smart Communities: A Case Study of Xuzhou City
Source: MDPI journal article supplement (doi:10.3390/ijerph20043750), 2023-02-20
Supplement: s1 [file s1]

**Table S4.** Binary logistic analysis results of demands for community services in smart communities with a demand proportion of more than 80%.

| Category                         | Type                                                      | SFM   | SEGS   | ESND  | ESA   | ESPHE | TS     | SRS    | FSE    |
|----------------------------------|-----------------------------------------------------------|-------|--------|-------|-------|-------|--------|--------|--------|
| Sociodemographic characteristics | Gender (Female)                                           | 0.503 | 0.739  | 0.606 | 0.632 | 0.546 | 0.814  | 0.681  | 1.256  |
|                                  | Age                                                       | 1.226 | 1.237  | 1.288 | 1.161 | 1.406 | 1.528  | 1.295  | 1.142  |
|                                  | Career                                                    | 1.000 | 1.000  | 1.000 | 1.000 | 1.000 | 1.000  | 1.000  | 1.000  |
|                                  | Staff of state-owned enterprises and institutions         | 1.075 | 0.468  | 1.398 | 0.748 | 1.002 | 1.576  | 2.069  | 0.909  |
|                                  | Staff of private and foreign enterprises and institutions | 0.909 | 0.856  | 1.950 | 0.555 | 1.289 | 1.370  | 2.568  | 1.340  |
|                                  | Individual industrial and commercial household            | 1.499 | 1.013  | 1.735 | 1.076 | 4.515 | 2.758  | 5.756  | 3.916  |
|                                  | Freelancer                                                | 1.706 | 0.654  | 1.239 | 1.186 | 2.784 | 2.292  | 6.235  | 3.525  |
|                                  | Student                                                   | 0.561 | 0.160  | 2.826 | 0.724 | 2.963 | 2.927  | 6.922  | 6.889  |
|                                  | Other                                                     | 0.588 | 0.339  | 0.802 | 0.754 | 1.447 | 3.491  | 3.937  | 3.112  |
|                                  | Educational level                                         | 1.140 | 1.029  | 1.206 | 1.057 | 1.246 | 1.451* | 1.402* | 1.537* |
|                                  | Marital status (Unmarried)                                | 2.128 | 5.207  | 0.665 | 1.195 | 0.604 | 0.625  | 0.994  | 0.477  |
| Living characteristics           | Living duration                                           | 0.766 | 0.773  | 0.818 | 0.684 | 0.792 | 0.779  | 1.100  | 0.612  |
|                                  | Housing choice                                            | 1.000 | 1.000  | 1.000 | 1.000 | 1.000 | 1.000  | 1.000  | 1.000  |
|                                  | House owner                                               | 1.195 | 1.413  | 2.061 | 2.050 | 1.655 | 0.904  | 0.975  | 0.440  |
|                                  | Other                                                     | 1.011 | 0.660  | 2.577 | 0.639 | 1.062 | 0.507  | 0.603  | 0.265  |
| Economic characteristics         | Monthly income                                            | 1.197 | 1.486* | 1.344 | 1.289 | 1.075 | 1.384  | 1.542* | 1.403  |
|                                  | Whether paying social insurance                           | 1.066 | 0.948  | 0.914 | 0.794 | 0.780 | 1.862  | 0.807  | 0.836  |

| Category                                       | Type                                | SFM     | SEGS   | ESND    | ESA     | ESPHE  | TS    | SRS   | FSE   |
|------------------------------------------------|-------------------------------------|---------|--------|---------|---------|--------|-------|-------|-------|
| Individual attitude characteristics            | Sense of gain                       | 1.006   | 1.615  | 0.803   | 1.527   | 1.211  | 1.103 | 1.653 | 1.887 |
|                                                | Sense of safety                     | 0.833   | 0.592  | 0.957   | 0.559   | 0.654  | 1.022 | 0.634 | 0.606 |
|                                                | Perception of community services    | 1.541   | 1.458  | 1.614*  | 1.595   | 1.399  | 1.188 | 1.528 | 1.146 |
|                                                | Desire for smart community services | 0.432** | 0.523* | 0.470** | 0.483** | 0.528* | 0.619 | 0.627 | 0.832 |
| The <i>p</i> value of Hosmer and Lemeshow Test |                                     | 0.359   | 0.197  | 0.144   | 0.543   | 0.341  | 0.620 | 0.110 | 0.346 |
| Percentage of correct prediction               |                                     | 83.3%   | 81.9%  | 81.0%   | 81.9%   | 83.3%  | 81.0% | 82.4% | 86.0% |

1. The data in the table are OR values; 2. \*\*\*  $p < 0.001$ , \*\*  $p < 0.01$ , \*  $p < 0.05$
